# Supplementary material for: Deep mendelian randomization: Investigating the causal knowledge of genomic deep learning models
Source: PubMed Central journal article supplement (PMC9624391; doi:10.1371/journal.pcbi.1009880), 2022-10-20
Supplement: pcbi.1009880.s001.pdf [file pcbi.1009880.s001.pdf]

### S1 Text. Computing Binding Probabilities.

Given a PWM and a DNA sequence, represented by its one-hot encoding  $\mathbf{s} \in \{0, 1\}^{4 \times L}$ , we want to obtain the probability of observing binding at any of the sequence's  $M$ -length subregions under the assumption that binding probabilities are independent across the subregions. We first compute the probability of binding at each subregion follow the process described by [1], a modified version of the energy-based model of binding proposed in [2].

To aggregate probabilities across positions into a single sequence binding probability, we let  $p_{i:i+M}$  denote the probability of the TF binding at sequence subregion spanning nucleotide  $i$  to  $i + M$  and compute the probability of binding somewhere on the sequence as

$$1 - \prod_{i=1}^{L-M} (1 - p_{i:i+M}).$$

That is, the probability of the TF binding somewhere is one minus the probability of it not binding anywhere. This operation is sometimes known as “soft-or”.

## References

1. Finkelstein M, Shrikumar A, Kundaje A. Look at the Loss: Towards Robust Detection of False Positive Feature Interactions Learned by Neural Networks on Genomic Data. In: Proceedings of the 37th International Conference on Machine Learning (ICML 2020). The 2020 ICML Workshop on Computational Biology; 2020.
2. Zhao Y, Ruan S, Pandey M, Stormo GD. Improved models for transcription factor binding site identification using nonindependent interactions. *Genetics*. 2012;191(3):781–790.
